# Supplementary material for: Transcription Factor Binding Profiles Reveal Cyclic Expression of Human Protein-coding Genes and Non-coding RNAs
Source: PLoS Comput Biol. 2013 Jul 11;9(7):e1003132. doi: 10.1371/journal.pcbi.1003132 (PMC3708869; doi:10.1371/journal.pcbi.1003132)
Supplement: Table S2 — The list of 424 ENCODE ChIP-seq experiment for transcription factors. (XLS) [file pcbi.1003132.s004.xls]

## Sheet: Exp2TF_name_422.txt
ENCODE ID	Lab_CellLine_TF	TF Name	HGNC
wgEncodeHaibTfbsA549CtcfPcr1xDexaAln_2Reps	HAIBTFBS_A549_CTCF	CTCF	CTCF
wgEncodeHaibTfbsA549CtcfPcr1xEtoh02Aln_2Reps	HAIBTFBS_A549_CTCF	CTCF	CTCF
wgEncodeHaibTfbsA549GrPcr1xDexbAln_2Reps	HAIBTFBS_A549_GR	NR3C1	NR3C1
wgEncodeHaibTfbsA549GrPcr1xDexcAln_2Reps	HAIBTFBS_A549_GR	NR3C1	NR3C1
wgEncodeHaibTfbsA549GrPcr1xDexdAln_2Reps	HAIBTFBS_A549_GR	NR3C1	NR3C1
wgEncodeHaibTfbsA549GrPcr1xEtoh02Aln_2Reps	HAIBTFBS_A549_GR	NR3C1	NR3C1
wgEncodeHaibTfbsA549GrPcr2xDexaAln_2Reps	HAIBTFBS_A549_GR	NR3C1	NR3C1
wgEncodeHaibTfbsA549GrPcr2xEtoh02Aln_2Reps	HAIBTFBS_A549_GR	NR3C1	NR3C1
wgEncodeHaibTfbsA549Usf1Pcr1xDexaAln_2Reps	HAIBTFBS_A549_USF1	USF1	USF1
wgEncodeHaibTfbsA549Usf1Pcr1xEtoh02Aln_2Reps	HAIBTFBS_A549_USF1	USF1	USF1
wgEncodeHaibTfbsEcc1EralphaaV0416102Dmso2Aln_2Reps	HAIBTFBS_ECC1_ERALPHAA	ESR1	ESR1
wgEncodeHaibTfbsEcc1EralphaaV0416102Estradia1hAln_2Reps	HAIBTFBS_ECC1_ERALPHAA	ESR1	ESR1
wgEncodeHaibTfbsEcc1EralphaaV0416102Gen1hAln_2Reps	HAIBTFBS_ECC1_ERALPHAA	ESR1	ESR1
wgEncodeHaibTfbsEcc1Foxa1c20V0416102Dmso2Aln_2Reps	HAIBTFBS_ECC1_FOXA1	FOXA1	FOXA1
wgEncodeHaibTfbsEcc1GrV0416102DexaAln_2Reps	HAIBTFBS_ECC1_GR	NR3C1	NR3C1
wgEncodeHaibTfbsEcc1GrV0416102Etoh02Aln_2Reps	HAIBTFBS_ECC1_GR	NR3C1	NR3C1
wgEncodeHaibTfbsGm12878Atf3Pcr1xAln_2Reps	HAIBTFBS_GM12878_ATF3	ATF3	ATF3
wgEncodeHaibTfbsGm12878BatfPcr1xAln_2Reps	HAIBTFBS_GM12878_BATF	BATF	BATF
wgEncodeHaibTfbsGm12878Bcl11aPcr1xAln_2Reps	HAIBTFBS_GM12878_BCL11A	BCL11A	BCL11A
wgEncodeHaibTfbsGm12878Bcl3Pcr1xAln_2Reps	HAIBTFBS_GM12878_BCL3	BCL3	BCL3
wgEncodeHaibTfbsGm12878Bclaf1m33V0416101Aln_2Reps	HAIBTFBS_GM12878_BCLAF1	BCLAF1	BCLAF1
wgEncodeHaibTfbsGm12878Ebf1c8Pcr1xAln_2Reps	HAIBTFBS_GM12878_EBF1C8	EBF1C8	EBF1
wgEncodeHaibTfbsGm12878EbfPcr1xAln_2Reps	HAIBTFBS_GM12878_EBF	EBF	EBF1
wgEncodeHaibTfbsGm12878Egr1Pcr2xAln_2Reps	HAIBTFBS_GM12878_EGR1	EGR1	EGR1
wgEncodeHaibTfbsGm12878Egr1V0416101Aln_2Reps	HAIBTFBS_GM12878_EGR1	EGR1	EGR1
wgEncodeHaibTfbsGm12878Elf1sc631V0416101Aln_2Reps	HAIBTFBS_GM12878_ELF1	ELF1	ELF1
wgEncodeHaibTfbsGm12878Ets1Pcr1xAln_2Reps	HAIBTFBS_GM12878_ETS1	ETS1	ETS1
wgEncodeHaibTfbsGm12878GabpPcr2xAln_2Reps	HAIBTFBS_GM12878_GABP	GABP	GABPA
wgEncodeHaibTfbsGm12878Irf4m17Pcr1xAln_2Reps	HAIBTFBS_GM12878_IRF4	IRF4	IRF4
wgEncodeHaibTfbsGm12878Irf4Pcr1xAln_2Reps	HAIBTFBS_GM12878_IRF4	IRF4	IRF4
wgEncodeHaibTfbsGm12878Mef2aPcr1xAln_2Reps	HAIBTFBS_GM12878_MEF2A	MEF2A	MEF2A
wgEncodeHaibTfbsGm12878Mef2csc13268Pcr1xAln_2Reps	HAIBTFBS_GM12878_MEF2C	MEF2C	MEF2C
wgEncodeHaibTfbsGm12878NrsfPcr2xAln_2Reps	HAIBTFBS_GM12878_NRSF	REST	REST
wgEncodeHaibTfbsGm12878Oct2Pcr1xAln_2Reps	HAIBTFBS_GM12878_OCT2	OCT2	POU2F2
wgEncodeHaibTfbsGm12878P300Pcr1xAln_2Reps	HAIBTFBS_GM12878_P300	P300	EP300
wgEncodeHaibTfbsGm12878Pax5c20Pcr1xAln_2Reps	HAIBTFBS_GM12878_PAX5	PAX5	PAX5
wgEncodeHaibTfbsGm12878Pax5n19Pcr1xAln_2Reps	HAIBTFBS_GM12878_PAX5	PAX5	PAX5
wgEncodeHaibTfbsGm12878Pbx3Pcr1xAln_2Reps	HAIBTFBS_GM12878_PBX3	PBX3	PBX3
wgEncodeHaibTfbsGm12878Pou2f2Pcr1xAln_2Reps	HAIBTFBS_GM12878_POU2F2	POU2F2	POU2F2
wgEncodeHaibTfbsGm12878Pu1Pcr1xAln_2Reps	HAIBTFBS_GM12878_PU1	PU1	SPI1
wgEncodeHaibTfbsGm12878Rad21V0416101Aln_2Reps	HAIBTFBS_GM12878_RAD21	RAD21	RAD21
wgEncodeHaibTfbsGm12878RxraPcr1xAln_2Reps	HAIBTFBS_GM12878_RXRA	RXRA	RXRA
wgEncodeHaibTfbsGm12878Sin3ak20Pcr1xAln_3Reps	HAIBTFBS_GM12878_SIN3AK20	SIN3AK20	SIN3A
wgEncodeHaibTfbsGm12878Six5Pcr1xAln_2Reps	HAIBTFBS_GM12878_SIX5	SIX5	SIX5
wgEncodeHaibTfbsGm12878Sp1Pcr1xAln_2Reps	HAIBTFBS_GM12878_SP1	SP1	SP1
wgEncodeHaibTfbsGm12878SrfPcr2xAln_2Reps	HAIBTFBS_GM12878_SRF	SRF	SRF
wgEncodeHaibTfbsGm12878SrfV0416101Aln_2Reps	HAIBTFBS_GM12878_SRF	SRF	SRF
wgEncodeHaibTfbsGm12878Taf1Pcr1xAln_2Reps	HAIBTFBS_GM12878_TAF1	TAF1	TAF1
wgEncodeHaibTfbsGm12878Tcf12Pcr1xAln_2Reps	HAIBTFBS_GM12878_TCF12	TCF12	TCF12
wgEncodeHaibTfbsGm12878Usf1Pcr2xAln_2Reps	HAIBTFBS_GM12878_USF1	USF1	USF1
wgEncodeHaibTfbsGm12878Yy1V0416101Aln_2Reps	HAIBTFBS_GM12878_YY1	YY1	YY1
wgEncodeHaibTfbsGm12878Zbtb33Pcr1xAln_2Reps	HAIBTFBS_GM12878_ZBTB33	ZBTB33	ZBTB33
wgEncodeHaibTfbsGm12878Zeb1sc25388V0416102Aln_2Reps	HAIBTFBS_GM12878_ZEB1	ZEB1	ZEB1
wgEncodeHaibTfbsGm12891Oct2Pcr1xAln_2Reps	HAIBTFBS_GM12891_OCT2	41549	POU2F2
wgEncodeHaibTfbsGm12891Pax5c20Pcr1xAln_2Reps	HAIBTFBS_GM12891_PAX5	PAX5	PAX5
wgEncodeHaibTfbsGm12891Pou2f2Pcr1xAln_2Reps	HAIBTFBS_GM12891_POU2F2	POU2F2	POU2F2
wgEncodeHaibTfbsGm12891Pu1Pcr1xAln_2Reps	HAIBTFBS_GM12891_PU1	PU1	SPI1
wgEncodeHaibTfbsGm12891Taf1Pcr1xAln_2Reps	HAIBTFBS_GM12891_TAF1	TAF1	TAF1
wgEncodeHaibTfbsGm12891Yy1c20V0416101Aln_2Reps	HAIBTFBS_GM12891_YY1	YY1	YY1
wgEncodeHaibTfbsGm12892Pax5c20Pcr1xAln_2Reps	HAIBTFBS_GM12892_PAX5	PAX5	PAX5
wgEncodeHaibTfbsGm12892Taf1Pcr1xAln_2Reps	HAIBTFBS_GM12892_TAF1	TAF1	TAF1
wgEncodeHaibTfbsGm12892Taf1V0416102Aln_2Reps	HAIBTFBS_GM12892_TAF1	TAF1	TAF1
wgEncodeHaibTfbsGm12892Yy1V0416101Aln_2Reps	HAIBTFBS_GM12892_YY1	YY1	YY1
wgEncodeHaibTfbsH1hescAtf3Pcr1xAln_2Reps	HAIBTFBS_H1HESC_ATF3	ATF3	ATF3
wgEncodeHaibTfbsH1hescBcl11aPcr1xAln_3Reps	HAIBTFBS_H1HESC_BCL11A	BCL11A	BCL11A
wgEncodeHaibTfbsH1hescBcl3Pcr1xAln_2Reps	HAIBTFBS_H1HESC_BCL3	BCL3	BCL3
wgEncodeHaibTfbsH1hescCtcfsc5916V0416102Aln_2Reps	HAIBTFBS_H1HESC_CTCF	CTCF	CTCF
wgEncodeHaibTfbsH1hescEgr1V0416101Aln_2Reps	HAIBTFBS_H1HESC_EGR1	EGR1	EGR1
wgEncodeHaibTfbsH1hescEgr1V0416102Aln_2Reps	HAIBTFBS_H1HESC_EGR1	EGR1	EGR1
wgEncodeHaibTfbsH1hescGabpPcr1xAln_2Reps	HAIBTFBS_H1HESC_GABP	GABP	GABPA
wgEncodeHaibTfbsH1hescHdac2sc6296V0416102Aln_2Reps	HAIBTFBS_H1HESC_HDAC2	HDAC2	HDAC2
wgEncodeHaibTfbsH1hescJundV0416102Aln_2Reps	HAIBTFBS_H1HESC_JUND	JUND	JUND
wgEncodeHaibTfbsH1hescNanogsc33759V0416102Aln_2Reps	HAIBTFBS_H1HESC_NANOG	NANOG	NANOG
wgEncodeHaibTfbsH1hescNrsfPcr1xAln_2Reps	HAIBTFBS_H1HESC_NRSF	REST	REST
wgEncodeHaibTfbsH1hescNrsfV0416102Aln_2Reps	HAIBTFBS_H1HESC_NRSF	REST	REST
wgEncodeHaibTfbsH1hescP300Pcr1xAln_2Reps	HAIBTFBS_H1HESC_P300	P300	EP300
wgEncodeHaibTfbsH1hescPou5f1sc9081V0416102Aln_2Reps	HAIBTFBS_H1HESC_POU5F1	POU5F1	POU5F1
wgEncodeHaibTfbsH1hescRad21V0416102Aln_2Reps	HAIBTFBS_H1HESC_RAD21	RAD21	RAD21
wgEncodeHaibTfbsH1hescRxraV0416102Aln_2Reps	HAIBTFBS_H1HESC_RXRA	RXRA	RXRA
wgEncodeHaibTfbsH1hescSin3ak20Pcr1xAln_2Reps	HAIBTFBS_H1HESC_SIN3AK20	SIN3AK20	SIN3A
wgEncodeHaibTfbsH1hescSix5Pcr1xAln_2Reps	HAIBTFBS_H1HESC_SIX5	SIX5	SIX5
wgEncodeHaibTfbsH1hescSp1Pcr1xAln_2Reps	HAIBTFBS_H1HESC_SP1	SP1	SP1
wgEncodeHaibTfbsH1hescSrfPcr1xAln_2Reps	HAIBTFBS_H1HESC_SRF	SRF	SRF
wgEncodeHaibTfbsH1hescTaf1Pcr1xAln_2Reps	HAIBTFBS_H1HESC_TAF1	TAF1	TAF1
wgEncodeHaibTfbsH1hescTaf1V0416102Aln_2Reps	HAIBTFBS_H1HESC_TAF1	TAF1	TAF1
wgEncodeHaibTfbsH1hescTaf7sq8V0416102Aln_2Reps	HAIBTFBS_H1HESC_TAF7	TAF7	TAF7
wgEncodeHaibTfbsH1hescTcf12Pcr1xAln_2Reps	HAIBTFBS_H1HESC_TCF12	TCF12	TCF12
wgEncodeHaibTfbsH1hescUsf1Pcr1xAln_2Reps	HAIBTFBS_H1HESC_USF1	USF1	USF1
wgEncodeHaibTfbsH1hescYy1c20Pcr1xAln_2Reps	HAIBTFBS_H1HESC_YY1	YY1	YY1
wgEncodeHaibTfbsHelas3GabpPcr1xAln_2Reps	HAIBTFBS_HELAS3_GABP	GABP	GABPA
wgEncodeHaibTfbsHelas3NrsfPcr1xAln_2Reps	HAIBTFBS_HELAS3_NRSF	REST	REST
wgEncodeHaibTfbsHelas3Taf1Pcr1xAln_2Reps	HAIBTFBS_HELAS3_TAF1	TAF1	TAF1
wgEncodeHaibTfbsHepg2Atf3Pcr1xAln_2Reps	HAIBTFBS_HEPG2_ATF3	ATF3	ATF3
wgEncodeHaibTfbsHepg2Bhlhe40V0416101Aln_3Reps	HAIBTFBS_HEPG2_BHLHE40	BHLHE40	BHLHE40
wgEncodeHaibTfbsHepg2CtcfV0416101Aln_2Reps	HAIBTFBS_HEPG2_CTCF	CTCF	CTCF
wgEncodeHaibTfbsHepg2Elf1sc631V0416101Aln_2Reps	HAIBTFBS_HEPG2_ELF1	ELF1	ELF1
wgEncodeHaibTfbsHepg2Fosl2Pcr1xAln_2Reps	HAIBTFBS_HEPG2_FOSL2	FOSL2	FOSL2
wgEncodeHaibTfbsHepg2Foxa1c20Pcr1xAln_2Reps	HAIBTFBS_HEPG2_FOXA1	FOXA1	FOXA1
wgEncodeHaibTfbsHepg2Foxa1sc101058Pcr1xAln_2Reps	HAIBTFBS_HEPG2_FOXA1	FOXA1	FOXA1
wgEncodeHaibTfbsHepg2Foxa2sc6554V0416101Aln_2Reps	HAIBTFBS_HEPG2_FOXA2	FOXA2	FOXA2
wgEncodeHaibTfbsHepg2GabpPcr2xAln_2Reps	HAIBTFBS_HEPG2_GABP	GABP	GABPA
wgEncodeHaibTfbsHepg2Hdac2sc6296V0416101Aln_2Reps	HAIBTFBS_HEPG2_HDAC2	HDAC2	HDAC2
wgEncodeHaibTfbsHepg2Hey1V0416101Aln_2Reps	HAIBTFBS_HEPG2_HEY1	HEY1	HEY1
wgEncodeHaibTfbsHepg2Hnf4ah171Pcr1xAln_2Reps	HAIBTFBS_HEPG2_HNF4AH171	HNF4AH171	HNF4A
wgEncodeHaibTfbsHepg2Hnf4gsc6558V0416101Aln_2Reps	HAIBTFBS_HEPG2_HNF4G	HNF4G	HNF4G
wgEncodeHaibTfbsHepg2JundPcr1xAln_2Reps	HAIBTFBS_HEPG2_JUND	JUND	JUND
wgEncodeHaibTfbsHepg2NrsfPcr2xAln_2Reps	HAIBTFBS_HEPG2_NRSF	REST	REST
wgEncodeHaibTfbsHepg2P300Pcr1xAln_2Reps	HAIBTFBS_HEPG2_P300	P300	EP300
wgEncodeHaibTfbsHepg2P300V0416101Aln_2Reps	HAIBTFBS_HEPG2_P300	P300	EP300
wgEncodeHaibTfbsHepg2Rad21V0416101Aln_2Reps	HAIBTFBS_HEPG2_RAD21	RAD21	RAD21
wgEncodeHaibTfbsHepg2RxraPcr1xAln_2Reps	HAIBTFBS_HEPG2_RXRA	RXRA	RXRA
wgEncodeHaibTfbsHepg2Sin3ak20Pcr1xAln_2Reps	HAIBTFBS_HEPG2_SIN3AK20	SIN3AK20	SIN3A
wgEncodeHaibTfbsHepg2Sp1Pcr1xAln_2Reps	HAIBTFBS_HEPG2_SP1	SP1	SP1
wgEncodeHaibTfbsHepg2SrfV0416101Aln_2Reps	HAIBTFBS_HEPG2_SRF	SRF	SRF
wgEncodeHaibTfbsHepg2Taf1Pcr2xAln_2Reps	HAIBTFBS_HEPG2_TAF1	TAF1	TAF1
wgEncodeHaibTfbsHepg2Tcf12Pcr1xAln_2Reps	HAIBTFBS_HEPG2_TCF12	TCF12	TCF12
wgEncodeHaibTfbsHepg2Usf1Pcr1xAln_2Reps	HAIBTFBS_HEPG2_USF1	USF1	USF1
wgEncodeHaibTfbsHepg2Zbtb33Pcr1xAln_2Reps	HAIBTFBS_HEPG2_ZBTB33	ZBTB33	ZBTB33
wgEncodeHaibTfbsHepg2Zbtb33V0416101Aln_2Reps	HAIBTFBS_HEPG2_ZBTB33	ZBTB33	ZBTB33
wgEncodeHaibTfbsHtb11NrsfPcr2xAln_2Reps	HAIBTFBS_HTB11_NRSF	REST	REST
wgEncodeHaibTfbsK562Bcl3Pcr1xAln_2Reps	HAIBTFBS_K562_BCL3	BCL3	BCL3
wgEncodeHaibTfbsK562Bclaf1m33Pcr1xAln_2Reps	HAIBTFBS_K562_BCLAF1M33	BCLAF1M33	BCLAF1
wgEncodeHaibTfbsK562Ctcflsc98982V0416101Aln_2Reps	HAIBTFBS_K562_CTCFL	CTCFL	CTCFL
wgEncodeHaibTfbsK562E2f6h50V0416102Aln_2Reps	HAIBTFBS_K562_E2F6	E2F6	E2F6
wgEncodeHaibTfbsK562Egr1V0416101Aln_2Reps	HAIBTFBS_K562_EGR1	EGR1	EGR1
wgEncodeHaibTfbsK562Elf1sc631V0416102Aln_2Reps	HAIBTFBS_K562_ELF1	ELF1	ELF1
wgEncodeHaibTfbsK562Ets1V0416101Aln_2Reps	HAIBTFBS_K562_ETS1	ETS1	ETS1
wgEncodeHaibTfbsK562Fosl1sc183V0416101Aln_2Reps	HAIBTFBS_K562_FOSL1	FOSL1	FOSL1
wgEncodeHaibTfbsK562GabpV0416101Aln_2Reps	HAIBTFBS_K562_GABP	GABP	GABPA
wgEncodeHaibTfbsK562Gata2cg2Pcr1xAln_2Reps	HAIBTFBS_K562_GATA2	GATA2	GATA2
wgEncodeHaibTfbsK562Hdac2sc6296V0416102Aln_2Reps	HAIBTFBS_K562_HDAC2	HDAC2	HDAC2
wgEncodeHaibTfbsK562Hey1Pcr1xAln_2Reps	HAIBTFBS_K562_HEY1	HEY1	HEY1
wgEncodeHaibTfbsK562MaxV0416102Aln_2Reps	HAIBTFBS_K562_MAX	MAX	MAX
wgEncodeHaibTfbsK562NrsfV0416102Aln_2Reps	HAIBTFBS_K562_NRSF	REST	REST
wgEncodeHaibTfbsK562Pu1Pcr1xAln_2Reps	HAIBTFBS_K562_PU1	PU1	SPI1
wgEncodeHaibTfbsK562Rad21V0416102Aln_2Reps	HAIBTFBS_K562_RAD21	RAD21	RAD21
wgEncodeHaibTfbsK562Sin3ak20V0416101Aln_2Reps	HAIBTFBS_K562_SIN3AK20	SIN3AK20	SIN3A
wgEncodeHaibTfbsK562Six5Pcr1xAln_2Reps	HAIBTFBS_K562_SIX5	SIX5	SIX5
wgEncodeHaibTfbsK562Sp1Pcr1xAln_2Reps	HAIBTFBS_K562_SP1	SP1	SP1
wgEncodeHaibTfbsK562Sp2sc643V0416102Aln_2Reps	HAIBTFBS_K562_SP2	SP2	SP2
wgEncodeHaibTfbsK562SrfV0416101Aln_2Reps	HAIBTFBS_K562_SRF	SRF	SRF
wgEncodeHaibTfbsK562Taf1Pcr1xAln_2Reps	HAIBTFBS_K562_TAF1	TAF1	TAF1
wgEncodeHaibTfbsK562Taf1V0416101Aln_2Reps	HAIBTFBS_K562_TAF1	TAF1	TAF1
wgEncodeHaibTfbsK562Taf7sq8V0416101Aln_2Reps	HAIBTFBS_K562_TAF7	TAF7	TAF7
wgEncodeHaibTfbsK562Thap1sc98174V0416101Aln_2Reps	HAIBTFBS_K562_THAP1	THAP1	THAP1
wgEncodeHaibTfbsK562Usf1V0416101Aln_2Reps	HAIBTFBS_K562_USF1	USF1	USF1
wgEncodeHaibTfbsK562Yy1V0416101Aln_2Reps	HAIBTFBS_K562_YY1	YY1	YY1
wgEncodeHaibTfbsK562Yy1V0416102Aln_2Reps	HAIBTFBS_K562_YY1	YY1	YY1
wgEncodeHaibTfbsK562Zbtb33Pcr1xAln_2Reps	HAIBTFBS_K562_ZBTB33	ZBTB33	ZBTB33
wgEncodeHaibTfbsK562Zbtb7asc34508V0416101Aln_2Reps	HAIBTFBS_K562_ZBTB7A	ZBTB7A	ZBTB7A
wgEncodeHaibTfbsPanc1NrsfPcr2xAln_2Reps	HAIBTFBS_PANC1_NRSF	REST	REST
wgEncodeHaibTfbsPfsk1NrsfPcr2xAln_2Reps	HAIBTFBS_PFSK1_NRSF	REST	REST
wgEncodeHaibTfbsSknshraCtcfV0416102Aln_2Reps	HAIBTFBS_SKNSHRA_CTCF	CTCF	CTCF
wgEncodeHaibTfbsSknshraP300V0416102Aln_2Reps	HAIBTFBS_SKNSHRA_P300	P300	EP300
wgEncodeHaibTfbsSknshraRad21V0416102Aln_2Reps	HAIBTFBS_SKNSHRA_RAD21	RAD21	RAD21
wgEncodeHaibTfbsSknshraUsf1sc8983V0416102Aln_2Reps	HAIBTFBS_SKNSHRA_USF1	USF1	USF1
wgEncodeHaibTfbsSknshraYy1c20V0416102Aln_2Reps	HAIBTFBS_SKNSHRA_YY1	YY1	YY1
wgEncodeHaibTfbsT47dCtcfsc5916V0416102Dmso2Aln_2Reps	HAIBTFBS_T47D_CTCF	CTCF	CTCF
wgEncodeHaibTfbsT47dEralphaaPcr2xGen1hAln_2Reps	HAIBTFBS_T47D_ERALPHAA	ESR1	ESR1
wgEncodeHaibTfbsT47dEralphaaV0416102Dmso2Aln_2Reps	HAIBTFBS_T47D_ERALPHAA	ESR1	ESR1
wgEncodeHaibTfbsT47dEralphaaV0416102Estradia1hAln_2Reps	HAIBTFBS_T47D_ERALPHAA	ESR1	ESR1
wgEncodeHaibTfbsT47dFoxa1c20V0416102Dmso2Aln_2Reps	HAIBTFBS_T47D_FOXA1	FOXA1	FOXA1
wgEncodeHaibTfbsT47dGata3sc268V0416102Dmso2Aln_2Reps	HAIBTFBS_T47D_GATA3	GATA3	GATA3
wgEncodeHaibTfbsT47dP300V0416102Dmso2Aln_2Reps	HAIBTFBS_T47D_P300	P300	EP300
wgEncodeHaibTfbsU87NrsfPcr2xAln_2Reps	HAIBTFBS_U87_NRSF	REST	REST
wgEncodeOpenChromChipFibroblCtcfAln_2Reps	OPENCHROMCHIP_FIBROBL_CTCF	CTCF	CTCF
wgEncodeOpenChromChipGlioblaCtcfAln_2Reps	OPENCHROMCHIP_GLIOBLA_CTCF	CTCF	CTCF
wgEncodeOpenChromChipGm12878CmycAln_2Reps	OPENCHROMCHIP_GM12878_CMYC	MYC	MYC
wgEncodeOpenChromChipGm12878CtcfAln_3Reps	OPENCHROMCHIP_GM12878_CTCF	CTCF	CTCF
wgEncodeOpenChromChipGm12891CtcfAln_2Reps	OPENCHROMCHIP_GM12891_CTCF	CTCF	CTCF
wgEncodeOpenChromChipGm12892CtcfAln_2Reps	OPENCHROMCHIP_GM12892_CTCF	CTCF	CTCF
wgEncodeOpenChromChipGm19238CtcfAln_2Reps	OPENCHROMCHIP_GM19238_CTCF	CTCF	CTCF
wgEncodeOpenChromChipGm19239CtcfAln_2Reps	OPENCHROMCHIP_GM19239_CTCF	CTCF	CTCF
wgEncodeOpenChromChipGm19240CtcfAln_2Reps	OPENCHROMCHIP_GM19240_CTCF	CTCF	CTCF
wgEncodeOpenChromChipH1hescCmycAln_1Reps	OPENCHROMCHIP_H1HESC_CMYC	MYC	MYC
wgEncodeOpenChromChipH1hescCtcfAln_1Reps	OPENCHROMCHIP_H1HESC_CTCF	CTCF	CTCF
wgEncodeOpenChromChipHelas3CmycAln_2Reps	OPENCHROMCHIP_HELAS3_CMYC	MYC	MYC
wgEncodeOpenChromChipHelas3CtcfAln_2Reps	OPENCHROMCHIP_HELAS3_CTCF	CTCF	CTCF
wgEncodeOpenChromChipHepg2CmycAln_3Reps	OPENCHROMCHIP_HEPG2_CMYC	MYC	MYC
wgEncodeOpenChromChipHepg2CtcfAln_2Reps	OPENCHROMCHIP_HEPG2_CTCF	CTCF	CTCF
wgEncodeOpenChromChipHuvecCmycAln_1Reps	OPENCHROMCHIP_HUVEC_CMYC	MYC	MYC
wgEncodeOpenChromChipHuvecCtcfAln_2Reps	OPENCHROMCHIP_HUVEC_CTCF	CTCF	CTCF
wgEncodeOpenChromChipK562CmycAln_3Reps	OPENCHROMCHIP_K562_CMYC	MYC	MYC
wgEncodeOpenChromChipK562CtcfAln_3Reps	OPENCHROMCHIP_K562_CTCF	CTCF	CTCF
wgEncodeOpenChromChipMcf7CmycEstroAln_2Reps	OPENCHROMCHIP_MCF7_CMYC	MYC	MYC
wgEncodeOpenChromChipMcf7CmycVehAln_2Reps	OPENCHROMCHIP_MCF7_CMYC	MYC	MYC
wgEncodeOpenChromChipMcf7CtcfAln_2Reps	OPENCHROMCHIP_MCF7_CTCF	CTCF	CTCF
wgEncodeOpenChromChipMcf7CtcfEstroAln_2Reps	OPENCHROMCHIP_MCF7_CTCF	CTCF	CTCF
wgEncodeOpenChromChipMcf7CtcfVehAln_2Reps	OPENCHROMCHIP_MCF7_CTCF	CTCF	CTCF
wgEncodeOpenChromChipNhekCtcfAln_2Reps	OPENCHROMCHIP_NHEK_CTCF	CTCF	CTCF
wgEncodeOpenChromChipProgfibCtcfAln_2Reps	OPENCHROMCHIP_PROGFIB_CTCF	CTCF	CTCF
wgEncodeSydhTfbsGm10847NfkbIggrabAln_5Reps	SYDHTFBS_GM10847_NFKB	NFKB	NFKB1
wgEncodeSydhTfbsGm12878Brca1cIggmusAln_2Reps	SYDHTFBS_GM12878_BRCA1C	BRCA1C	BRCA1
wgEncodeSydhTfbsGm12878CfosStdAln_3Reps	SYDHTFBS_GM12878_CFOS	CFOS	FOS
wgEncodeSydhTfbsGm12878Chd21250IggmusAln_2Reps	SYDHTFBS_GM12878_CHD2	CHD2	CHD2
wgEncodeSydhTfbsGm12878Ctcfc20StdAln_2Reps	SYDHTFBS_GM12878_CTCF	CTCF	CTCF
wgEncodeSydhTfbsGm12878EbfStdAln_2Reps	SYDHTFBS_GM12878_EBF	EBF	EBF1
wgEncodeSydhTfbsGm12878Gcn5StdAln_2Reps	SYDHTFBS_GM12878_GCN5	GCN5	KAT2A
wgEncodeSydhTfbsGm12878Irf3StdAln_2Reps	SYDHTFBS_GM12878_IRF3	IRF3	IRF3
wgEncodeSydhTfbsGm12878JundStdAln_2Reps	SYDHTFBS_GM12878_JUND	JUND	JUND
wgEncodeSydhTfbsGm12878MaxStdAln_2Reps	SYDHTFBS_GM12878_MAX	MAX	MAX
wgEncodeSydhTfbsGm12878Nfe2hStdAln_2Reps	SYDHTFBS_GM12878_NFE2H	NFE2H	NFE2
wgEncodeSydhTfbsGm12878NfkbIggrabAln_4Reps	SYDHTFBS_GM12878_NFKB	NFKB	NFKB1
wgEncodeSydhTfbsGm12878NfkbTnfaStdAln_4Reps	SYDHTFBS_GM12878_NFKB	NFKB	NFKB1
wgEncodeSydhTfbsGm12878Nrf1IggmusAln_2Reps	SYDHTFBS_GM12878_NRF1	NRF1	NRF1
wgEncodeSydhTfbsGm12878P300n15StdAln_2Reps	SYDHTFBS_GM12878_P300	P300	EP300
wgEncodeSydhTfbsGm12878Rad21IggrabAln_2Reps	SYDHTFBS_GM12878_RAD21	RAD21	RAD21
wgEncodeSydhTfbsGm12878Rfx5n494IggmusAln_2Reps	SYDHTFBS_GM12878_RFX5	RFX5	RFX5
wgEncodeSydhTfbsGm12878Smc3ab9263IggmusAln_2Reps	SYDHTFBS_GM12878_SMC3	SMC3	SMC3
wgEncodeSydhTfbsGm12878Spt20StdAln_2Reps	SYDHTFBS_GM12878_SPT20	SPT20	FAM48A
wgEncodeSydhTfbsGm12878Stat1StdAln_2Reps	SYDHTFBS_GM12878_STAT1	STAT1	STAT1
wgEncodeSydhTfbsGm12878Stat3IggmusAln_2Reps	SYDHTFBS_GM12878_STAT3	STAT3	STAT3
wgEncodeSydhTfbsGm12878TbpIggmusAln_2Reps	SYDHTFBS_GM12878_TBP	TBP	TBP
wgEncodeSydhTfbsGm12878Tr4StdAln_2Reps	SYDHTFBS_GM12878_TR4	NR2C2	NR2C2
wgEncodeSydhTfbsGm12878Usf2IggmusAln_2Reps	SYDHTFBS_GM12878_USF2	USF2	USF2
wgEncodeSydhTfbsGm12878WhipIggmusAln_2Reps	SYDHTFBS_GM12878_WHIP	WHIP	WRNIP1
wgEncodeSydhTfbsGm12878Yy1StdAln_2Reps	SYDHTFBS_GM12878_YY1	YY1	YY1
wgEncodeSydhTfbsGm12878Znf143166181apStdAln_2Reps	SYDHTFBS_GM12878_ZNF143	ZNF143	ZNF143
wgEncodeSydhTfbsGm12878Zzz3StdAln_2Reps	SYDHTFBS_GM12878_ZZZ3	ZZZ3	ZZZ3
wgEncodeSydhTfbsGm12891NfkbIggrabAln_3Reps	SYDHTFBS_GM12891_NFKB	NFKB	NFKB1
wgEncodeSydhTfbsGm12892NfkbIggrabAln_3Reps	SYDHTFBS_GM12892_NFKB	NFKB	NFKB1
wgEncodeSydhTfbsGm15510NfkbIggrabAln_5Reps	SYDHTFBS_GM15510_NFKB	NFKB	NFKB1
wgEncodeSydhTfbsGm18505NfkbIggrabAln_5Reps	SYDHTFBS_GM18505_NFKB	NFKB	NFKB1
wgEncodeSydhTfbsGm18526NfkbIggrabAln_3Reps	SYDHTFBS_GM18526_NFKB	NFKB	NFKB1
wgEncodeSydhTfbsGm18951NfkbIggrabAln_4Reps	SYDHTFBS_GM18951_NFKB	NFKB	NFKB1
wgEncodeSydhTfbsGm19099NfkbIggrabAln_3Reps	SYDHTFBS_GM19099_NFKB	NFKB	NFKB1
wgEncodeSydhTfbsGm19193NfkbIggrabAln_3Reps	SYDHTFBS_GM19193_NFKB	NFKB	NFKB1
wgEncodeSydhTfbsH1hescCjunIggrabAln_2Reps	SYDHTFBS_H1HESC_CJUN	JUN	JUN
wgEncodeSydhTfbsH1hescCtbp2UcdAln_2Reps	SYDHTFBS_H1HESC_CTBP2	CTBP2	CTBP2
wgEncodeSydhTfbsH1hescMaxUcdAln_2Reps	SYDHTFBS_H1HESC_MAX	MAX	MAX
wgEncodeSydhTfbsH1hescNrf1IggrabAln_2Reps	SYDHTFBS_H1HESC_NRF1	NRF1	NRF1
wgEncodeSydhTfbsH1hescRad21IggrabAln_2Reps	SYDHTFBS_H1HESC_RAD21	RAD21	RAD21
wgEncodeSydhTfbsH1hescRfx5n494IggrabAln_2Reps	SYDHTFBS_H1HESC_RFX5	RFX5	RFX5
wgEncodeSydhTfbsH1hescSuz12UcdAln_2Reps	SYDHTFBS_H1HESC_SUZ12	SUZ12	SUZ12
wgEncodeSydhTfbsH1hescTbpStdAln_2Reps	SYDHTFBS_H1HESC_TBP	TBP	TBP
wgEncodeSydhTfbsH1hescUsf2IggrabAln_2Reps	SYDHTFBS_H1HESC_USF2	USF2	USF2
wgEncodeSydhTfbsHct116Tcf4UcdAln_2Reps	SYDHTFBS_HCT116_TCF4	TCF4	TCF4
wgEncodeSydhTfbsHek293bElk4UcdAln_2Reps	SYDHTFBS_HEK293B_ELK4	ELK4	ELK4
wgEncodeSydhTfbsHek293bKap1UcdAln_2Reps	SYDHTFBS_HEK293B_KAP1	KAP1	TRIM28
wgEncodeSydhTfbsHelas3Ap2alphaStdAln_2Reps	SYDHTFBS_HELAS3_AP2ALPHA	AP2ALPHA	TFAP2A
wgEncodeSydhTfbsHelas3Ap2gammaStdAln_2Reps	SYDHTFBS_HELAS3_AP2GAMMA	AP2GAMMA	TFAP2C
wgEncodeSydhTfbsHelas3Baf155IggmusAln_3Reps	SYDHTFBS_HELAS3_BAF155	BAF155	SMARCC1
wgEncodeSydhTfbsHelas3Baf170IggmusAln_3Reps	SYDHTFBS_HELAS3_BAF170	BAF170	SMARCC2
wgEncodeSydhTfbsHelas3Bdp1StdAln_2Reps	SYDHTFBS_HELAS3_BDP1	BDP1	BDP1
wgEncodeSydhTfbsHelas3Brca1cIggrabAln_2Reps	SYDHTFBS_HELAS3_BRCA1C	BRCA1C	BRCA1
wgEncodeSydhTfbsHelas3Brf1StdAln_2Reps	SYDHTFBS_HELAS3_BRF1	BRF1	BRF1
wgEncodeSydhTfbsHelas3Brf2StdAln_2Reps	SYDHTFBS_HELAS3_BRF2	BRF2	BRF2
wgEncodeSydhTfbsHelas3Brg1IggmusAln_3Reps	SYDHTFBS_HELAS3_BRG1	BRG1	SMARCA4
wgEncodeSydhTfbsHelas3CebpbIggrabAln_2Reps	SYDHTFBS_HELAS3_CEBPB	CEBPB	CEBPB
wgEncodeSydhTfbsHelas3CfosStdAln_2Reps	SYDHTFBS_HELAS3_CFOS	CFOS	FOS
wgEncodeSydhTfbsHelas3CjunIggrabAln_2Reps	SYDHTFBS_HELAS3_CJUN	JUN	JUN
wgEncodeSydhTfbsHelas3CmycStdAln_2Reps	SYDHTFBS_HELAS3_CMYC	MYC	MYC
wgEncodeSydhTfbsHelas3E2f1StdAln_2Reps	SYDHTFBS_HELAS3_E2F1	E2F1	E2F1
wgEncodeSydhTfbsHelas3E2f4StdAln_2Reps	SYDHTFBS_HELAS3_E2F4	E2F4	E2F4
wgEncodeSydhTfbsHelas3E2f6StdAln_2Reps	SYDHTFBS_HELAS3_E2F6	E2F6	E2F6
wgEncodeSydhTfbsHelas3Elk4UcdAln_2Reps	SYDHTFBS_HELAS3_ELK4	ELK4	ELK4
wgEncodeSydhTfbsHelas3Gcn5StdAln_2Reps	SYDHTFBS_HELAS3_GCN5	GCN5	KAT2A
wgEncodeSydhTfbsHelas3Gtf2f1rapIggrabAln_2Reps	SYDHTFBS_HELAS3_GTF2F1	GTF2F1	GTF2F1
wgEncodeSydhTfbsHelas3Hae2f1StdAln_2Reps	SYDHTFBS_HELAS3_HAE2F1	HAE2F1	E2F1
wgEncodeSydhTfbsHelas3Ini1IggmusAln_3Reps	SYDHTFBS_HELAS3_INI1	INI1	SMARCB1
wgEncodeSydhTfbsHelas3Irf3IggrabAln_2Reps	SYDHTFBS_HELAS3_IRF3	IRF3	IRF3
wgEncodeSydhTfbsHelas3JundIggrabAln_2Reps	SYDHTFBS_HELAS3_JUND	JUND	JUND
wgEncodeSydhTfbsHelas3MaxStdAln_2Reps	SYDHTFBS_HELAS3_MAX	MAX	MAX
wgEncodeSydhTfbsHelas3Mxi1bhlhIggrabAln_2Reps	SYDHTFBS_HELAS3_MXI1	MXI1	MXI1
wgEncodeSydhTfbsHelas3Nrf1IggmusAln_2Reps	SYDHTFBS_HELAS3_NRF1	NRF1	NRF1
wgEncodeSydhTfbsHelas3P300n15IggrabAln_2Reps	SYDHTFBS_HELAS3_P300	P300	EP300
wgEncodeSydhTfbsHelas3Prdm1vIggrabAln_2Reps	SYDHTFBS_HELAS3_PRDM1	PRDM1	PRDM1
wgEncodeSydhTfbsHelas3Rad21IggrabAln_2Reps	SYDHTFBS_HELAS3_RAD21	RAD21	RAD21
wgEncodeSydhTfbsHelas3Rfx5n494IggrabAln_2Reps	SYDHTFBS_HELAS3_RFX5	RFX5	RFX5
wgEncodeSydhTfbsHelas3Rpc155StdAln_2Reps	SYDHTFBS_HELAS3_RPC155	RPC155	POLR3A
wgEncodeSydhTfbsHelas3Smc3ab9263IggrabAln_2Reps	SYDHTFBS_HELAS3_SMC3	SMC3	SMC3
wgEncodeSydhTfbsHelas3Spt20StdAln_2Reps	SYDHTFBS_HELAS3_SPT20	SPT20	FAM48A
wgEncodeSydhTfbsHelas3Stat1Ifng30StdAln_2Reps	SYDHTFBS_HELAS3_STAT1	STAT1	STAT1
wgEncodeSydhTfbsHelas3Stat3IggrabAln_2Reps	SYDHTFBS_HELAS3_STAT3	STAT3	STAT3
wgEncodeSydhTfbsHelas3TbpIggrabAln_2Reps	SYDHTFBS_HELAS3_TBP	TBP	TBP
wgEncodeSydhTfbsHelas3Tf3c110StdAln_2Reps	SYDHTFBS_HELAS3_TF3C110	TF3C110	GTF2B
wgEncodeSydhTfbsHelas3Tr4StdAln_2Reps	SYDHTFBS_HELAS3_TR4	NR2C2	NR2C2
wgEncodeSydhTfbsHelas3Usf2IggmusAln_2Reps	SYDHTFBS_HELAS3_USF2	USF2	USF2
wgEncodeSydhTfbsHelas3Znf274UcdAln_2Reps	SYDHTFBS_HELAS3_ZNF274	ZNF274	ZNF274
wgEncodeSydhTfbsHelas3Zzz3StdAln_2Reps	SYDHTFBS_HELAS3_ZZZ3	ZZZ3	ZZZ3
wgEncodeSydhTfbsHepg2bTr4UcdAln_2Reps	SYDHTFBS_HEPG2B_TR4	NR2C2	NR2C2
wgEncodeSydhTfbsHepg2bZnf274UcdAln_2Reps	SYDHTFBS_HEPG2B_ZNF274	ZNF274	ZNF274
wgEncodeSydhTfbsHepg2CebpbForsklnStdAln_2Reps	SYDHTFBS_HEPG2_CEBPB	CEBPB	CEBPB
wgEncodeSydhTfbsHepg2CebpbIggrabAln_2Reps	SYDHTFBS_HEPG2_CEBPB	CEBPB	CEBPB
wgEncodeSydhTfbsHepg2Chd21250IggrabAln_2Reps	SYDHTFBS_HEPG2_CHD2	CHD2	CHD2
wgEncodeSydhTfbsHepg2CjunIggrabAln_2Reps	SYDHTFBS_HEPG2_CJUN	JUN	JUN
wgEncodeSydhTfbsHepg2ErraForsklnStdAln_2Reps	SYDHTFBS_HEPG2_ERRA	ERRA	ESRRA
wgEncodeSydhTfbsHepg2Grp20ForsklnStdAln_2Reps	SYDHTFBS_HEPG2_GRP20	GRp20	NR3C1
wgEncodeSydhTfbsHepg2Hnf4aForsklnStdAln_2Reps	SYDHTFBS_HEPG2_HNF4A	HNF4A	HNF4A
wgEncodeSydhTfbsHepg2Hsf1ForsklnStdAln_2Reps	SYDHTFBS_HEPG2_HSF1	HSF1	HSF1
wgEncodeSydhTfbsHepg2Irf3IggrabAln_2Reps	SYDHTFBS_HEPG2_IRF3	IRF3	IRF3
wgEncodeSydhTfbsHepg2JundIggrabAln_2Reps	SYDHTFBS_HEPG2_JUND	JUND	JUND
wgEncodeSydhTfbsHepg2Maffm8194IggrabAln_2Reps	SYDHTFBS_HEPG2_MAF	MAFF	MAFF
wgEncodeSydhTfbsHepg2Mafkab50322IggrabAln_2Reps	SYDHTFBS_HEPG2_MAFK	MAFK	MAFK
wgEncodeSydhTfbsHepg2Mafksc477IggrabAln_2Reps	SYDHTFBS_HEPG2_MAFK	MAFK	MAFK
wgEncodeSydhTfbsHepg2Nrf1IggrabAln_2Reps	SYDHTFBS_HEPG2_NRF1	NRF1	NRF1
wgEncodeSydhTfbsHepg2Pgc1aForsklnStdAln_2Reps	SYDHTFBS_HEPG2_PGC1A	PGC1A	PPARGC1A
wgEncodeSydhTfbsHepg2Rad21IggrabAln_2Reps	SYDHTFBS_HEPG2_RAD21	RAD21	RAD21
wgEncodeSydhTfbsHepg2Rfx5n494IggrabAln_2Reps	SYDHTFBS_HEPG2_RFX5	RFX5	RFX5
wgEncodeSydhTfbsHepg2Srebp1InslnStdAln_3Reps	SYDHTFBS_HEPG2_SREBP1	SREBP1	SREBF1
wgEncodeSydhTfbsHepg2Srebp1PravastStdAln_3Reps	SYDHTFBS_HEPG2_SREBP1	SREBP1	SREBF1
wgEncodeSydhTfbsHepg2Srebp2PravastStdAln_3Reps	SYDHTFBS_HEPG2_SREBP2	SREBP2	SREBF2
wgEncodeSydhTfbsHepg2TbpIggrabAln_2Reps	SYDHTFBS_HEPG2_TBP	TBP	TBP
wgEncodeSydhTfbsHepg2Tcf4UcdAln_2Reps	SYDHTFBS_HEPG2_TCF4	TCF4	TCF4
wgEncodeSydhTfbsHepg2Usf2IggrabAln_2Reps	SYDHTFBS_HEPG2_USF2	USF2	USF2
wgEncodeSydhTfbsHuvecCfosUcdAln_2Reps	SYDHTFBS_HUVEC_CFOS	CFOS	FOS
wgEncodeSydhTfbsHuvecCjunStdAln_2Reps	SYDHTFBS_HUVEC_CJUN	JUN	JUN
wgEncodeSydhTfbsHuvecGata2UcdAln_2Reps	SYDHTFBS_HUVEC_GATA2	GATA2	GATA2
wgEncodeSydhTfbsHuvecMaxStdAln_2Reps	SYDHTFBS_HUVEC_MAX	MAX	MAX
wgEncodeSydhTfbsK562Atf3StdAln_2Reps	SYDHTFBS_K562_ATF3	ATF3	ATF3
wgEncodeSydhTfbsK562Bdp1StdAln_3Reps	SYDHTFBS_K562_BDP1	BDP1	BDP1
wgEncodeSydhTfbsK562bE2f4UcdAln_2Reps	SYDHTFBS_K562B_E2F4	E2F4	E2F4
wgEncodeSydhTfbsK562bE2f6UcdAln_2Reps	SYDHTFBS_K562B_E2F6	E2F6	E2F6
wgEncodeSydhTfbsK562bGata1UcdAln_2Reps	SYDHTFBS_K562B_GATA1	GATA1	GATA1
wgEncodeSydhTfbsK562bGata2UcdAln_2Reps	SYDHTFBS_K562B_GATA2	GATA2	GATA2
wgEncodeSydhTfbsK562bKap1UcdAln_2Reps	SYDHTFBS_K562B_KAP1	KAP1	TRIM28
wgEncodeSydhTfbsK562Brf1StdAln_3Reps	SYDHTFBS_K562_BRF1	BRF1	BRF1
wgEncodeSydhTfbsK562Brf2StdAln_3Reps	SYDHTFBS_K562_BRF2	BRF2	BRF2
wgEncodeSydhTfbsK562Brg1IggmusAln_2Reps	SYDHTFBS_K562_BRG1	BRG1	SMARCA4
wgEncodeSydhTfbsK562bSetdb1MnasedUcdAln_2Reps	SYDHTFBS_K562B_SETDB1	SETDB1	SETDB1
wgEncodeSydhTfbsK562bSetdb1UcdAln_2Reps	SYDHTFBS_K562B_SETDB1	SETDB1	SETDB1
wgEncodeSydhTfbsK562bTr4UcdAln_2Reps	SYDHTFBS_K562B_TR4	NR2C2	NR2C2
wgEncodeSydhTfbsK562bYy1UcdAln_2Reps	SYDHTFBS_K562B_YY1	YY1	YY1
wgEncodeSydhTfbsK562bZnf263UcdAln_2Reps	SYDHTFBS_K562B_ZNF263	ZNF263	ZNF263
wgEncodeSydhTfbsK562bZnf274UcdAln_2Reps	SYDHTFBS_K562B_ZNF274	ZNF274	ZNF274
wgEncodeSydhTfbsK562Ccnt2StdAln_2Reps	SYDHTFBS_K562_CCNT2	CCNT2	CCNT2
wgEncodeSydhTfbsK562CebpbIggrabAln_2Reps	SYDHTFBS_K562_CEBPB	CEBPB	CEBPB
wgEncodeSydhTfbsK562CfosStdAln_3Reps	SYDHTFBS_K562_CFOS	CFOS	FOS
wgEncodeSydhTfbsK562Chd21250IggrabAln_2Reps	SYDHTFBS_K562_CHD2	CHD2	CHD2
wgEncodeSydhTfbsK562CjunIfna6hStdAln_2Reps	SYDHTFBS_K562_CJUN	JUN	JUN
wgEncodeSydhTfbsK562CjunIfng30StdAln_2Reps	SYDHTFBS_K562_CJUN	JUN	JUN
wgEncodeSydhTfbsK562CjunIfng6hStdAln_2Reps	SYDHTFBS_K562_CJUN	JUN	JUN
wgEncodeSydhTfbsK562CjunStdAln_2Reps	SYDHTFBS_K562_CJUN	JUN	JUN
wgEncodeSydhTfbsK562CmycIfna30StdAln_2Reps	SYDHTFBS_K562_CMYC	MYC	MYC
wgEncodeSydhTfbsK562CmycIfna6hStdAln_2Reps	SYDHTFBS_K562_CMYC	MYC	MYC
wgEncodeSydhTfbsK562CmycIfng30StdAln_2Reps	SYDHTFBS_K562_CMYC	MYC	MYC
wgEncodeSydhTfbsK562CmycIfng6hStdAln_2Reps	SYDHTFBS_K562_CMYC	MYC	MYC
wgEncodeSydhTfbsK562CmycStdAln_2Reps	SYDHTFBS_K562_CMYC	MYC	MYC
wgEncodeSydhTfbsK562Gtf2bStdAln_2Reps	SYDHTFBS_K562_GTF2B	GTF2B	GTF2B
wgEncodeSydhTfbsK562Gtf2f1rapIggrabAln_2Reps	SYDHTFBS_K562_GTF2F1	GTF2F1	GTF2F1
wgEncodeSydhTfbsK562Hmgn3StdAln_2Reps	SYDHTFBS_K562_HMGN3	HMGN3	HMGN3
wgEncodeSydhTfbsK562Ini1IggmusAln_2Reps	SYDHTFBS_K562_INI1	INI1	SMARCB1
wgEncodeSydhTfbsK562Irf1Ifna30StdAln_2Reps	SYDHTFBS_K562_IRF1	IRF1	IRF1
wgEncodeSydhTfbsK562Irf1Ifng6hStdAln_2Reps	SYDHTFBS_K562_IRF1	IRF1	IRF1
wgEncodeSydhTfbsK562JundStdAln_2Reps	SYDHTFBS_K562_JUND	JUND	JUND
wgEncodeSydhTfbsK562Mafkab50322IggrabAln_2Reps	SYDHTFBS_K562_MAFK	MAFK	MAFK
wgEncodeSydhTfbsK562MaxStdAln_2Reps	SYDHTFBS_K562_MAX	MAX	MAX
wgEncodeSydhTfbsK562Mxi1bhlhIggrabAln_2Reps	SYDHTFBS_K562_MXI1	MXI1	MXI1
wgEncodeSydhTfbsK562NelfeStdAln_2Reps	SYDHTFBS_K562_NELFE	NELFE	RDBP
wgEncodeSydhTfbsK562Nfe2StdAln_2Reps	SYDHTFBS_K562_NFE2	NFE2	NFE2
wgEncodeSydhTfbsK562NfyaStdAln_2Reps	SYDHTFBS_K562_NFYA	NFYA	NFYA
wgEncodeSydhTfbsK562NfybStdAln_2Reps	SYDHTFBS_K562_NFYB	NFYB	NFYB
wgEncodeSydhTfbsK562Nrf1IggrabAln_2Reps	SYDHTFBS_K562_NRF1	NRF1	NRF1
wgEncodeSydhTfbsK562P300f4IggrabAln_2Reps	SYDHTFBS_K562_P300	P300	EP300
wgEncodeSydhTfbsK562Rad21StdAln_2Reps	SYDHTFBS_K562_RAD21	RAD21	RAD21
wgEncodeSydhTfbsK562Rpc155StdAln_2Reps	SYDHTFBS_K562_RPC155	RPC155	POLR3A
wgEncodeSydhTfbsK562Sirt6StdAln_2Reps	SYDHTFBS_K562_SIRT6	SIRT6	SIRT6
wgEncodeSydhTfbsK562Smc3ab9263IggrabAln_2Reps	SYDHTFBS_K562_SMC3	SMC3	SMC3
wgEncodeSydhTfbsK562Stat1Ifna30StdAln_2Reps	SYDHTFBS_K562_STAT1	STAT1	STAT1
wgEncodeSydhTfbsK562Stat1Ifna6hStdAln_2Reps	SYDHTFBS_K562_STAT1	STAT1	STAT1
wgEncodeSydhTfbsK562Stat1Ifng30StdAln_2Reps	SYDHTFBS_K562_STAT1	STAT1	STAT1
wgEncodeSydhTfbsK562Stat1Ifng6hStdAln_2Reps	SYDHTFBS_K562_STAT1	STAT1	STAT1
wgEncodeSydhTfbsK562Stat2Ifna30StdAln_2Reps	SYDHTFBS_K562_STAT2	STAT2	STAT2
wgEncodeSydhTfbsK562Stat2Ifna6hStdAln_2Reps	SYDHTFBS_K562_STAT2	STAT2	STAT2
wgEncodeSydhTfbsK562Tal1sc12984IggmusAln_2Reps	SYDHTFBS_K562_TAL1	TAL1	TAL1
wgEncodeSydhTfbsK562TbpIggmusAln_2Reps	SYDHTFBS_K562_TBP	TBP	TBP
wgEncodeSydhTfbsK562Tf3c110StdAln_3Reps	SYDHTFBS_K562_TF3C110	TF3C110	GTF2B
wgEncodeSydhTfbsK562Usf2StdAln_2Reps	SYDHTFBS_K562_USF2	USF2	USF2
wgEncodeSydhTfbsK562Xrcc4StdAln_2Reps	SYDHTFBS_K562_XRCC4	XRCC4	XRCC4
wgEncodeSydhTfbsMcf10aesStat3Etoh01bStdAln_2Reps	SYDHTFBS_MCF10AES_STAT3	STAT3	STAT3
wgEncodeSydhTfbsMcf10aesStat3Etoh01cStdAln_2Reps	SYDHTFBS_MCF10AES_STAT3	STAT3	STAT3
wgEncodeSydhTfbsMcf10aesStat3Etoh01StdAln_2Reps	SYDHTFBS_MCF10AES_STAT3	STAT3	STAT3
wgEncodeSydhTfbsMcf10aesStat3TamStdAln_2Reps	SYDHTFBS_MCF10AES_STAT3	STAT3	STAT3
wgEncodeSydhTfbsMcf7Hae2f1UcdAln_2Reps	SYDHTFBS_MCF7_HAE2F1	HAE2F1	E2F1
wgEncodeSydhTfbsNb4CmycStdAln_2Reps	SYDHTFBS_NB4_CMYC	MYC	MYC
wgEncodeSydhTfbsNb4MaxStdAln_2Reps	SYDHTFBS_NB4_MAX	MAX	MAX
wgEncodeSydhTfbsNt2d1Suz12UcdAln_2Reps	SYDHTFBS_NT2D1_SUZ12	SUZ12	SUZ12
wgEncodeSydhTfbsNt2d1Yy1UcdAln_2Reps	SYDHTFBS_NT2D1_YY1	YY1	YY1
wgEncodeSydhTfbsNt2d1Znf274UcdAln_2Reps	SYDHTFBS_NT2D1_ZNF274	ZNF274	ZNF274
wgEncodeSydhTfbsPbdeGata1UcdAln_2Reps	SYDHTFBS_PBDE_GATA1	GATA1	GATA1
wgEncodeSydhTfbsShsy5yGata2UcdAln_2Reps	SYDHTFBS_SHSY5Y_GATA2	GATA2	GATA2
wgEncodeSydhTfbsTrexhek293Znf263UcdAln_2Reps	SYDHTFBS_TREXHEK293_ZNF263	ZNF263	ZNF263
wgEncodeSydhTfbsU2osKap1UcdAln_2Reps	SYDHTFBS_U2OS_KAP1	KAP1	TRIM28
wgEncodeSydhTfbsU2osSetdb1UcdAln_2Reps	SYDHTFBS_U2OS_SETDB1	SETDB1	SETDB1
wgEncodeUwTfbsAg04449CtcfStdAln_2Reps	UWTFBS_AG04449_CTCF	CTCF	CTCF
wgEncodeUwTfbsAg04450CtcfStdAln_1Reps	UWTFBS_AG04450_CTCF	CTCF	CTCF
wgEncodeUwTfbsAg09309CtcfStdAln_2Reps	UWTFBS_AG09309_CTCF	CTCF	CTCF
wgEncodeUwTfbsAg09319CtcfStdAln_2Reps	UWTFBS_AG09319_CTCF	CTCF	CTCF
wgEncodeUwTfbsAg10803CtcfStdAln_2Reps	UWTFBS_AG10803_CTCF	CTCF	CTCF
wgEncodeUwTfbsAoafCtcfStdAln_2Reps	UWTFBS_AOAF_CTCF	CTCF	CTCF
wgEncodeUwTfbsBjCtcfStdAln_2Reps	UWTFBS_BJ_CTCF	CTCF	CTCF
wgEncodeUwTfbsCaco2CtcfStdAln_2Reps	UWTFBS_CACO2_CTCF	CTCF	CTCF
wgEncodeUwTfbsGm06990CtcfStdAln_2Reps	UWTFBS_GM06990_CTCF	CTCF	CTCF
wgEncodeUwTfbsGm12801CtcfStdAln_1Reps	UWTFBS_GM12801_CTCF	CTCF	CTCF
wgEncodeUwTfbsGm12864CtcfStdAln_2Reps	UWTFBS_GM12864_CTCF	CTCF	CTCF
wgEncodeUwTfbsGm12865CtcfStdAln_2Reps	UWTFBS_GM12865_CTCF	CTCF	CTCF
wgEncodeUwTfbsGm12872CtcfStdAln_2Reps	UWTFBS_GM12872_CTCF	CTCF	CTCF
wgEncodeUwTfbsGm12873CtcfStdAln_2Reps	UWTFBS_GM12873_CTCF	CTCF	CTCF
wgEncodeUwTfbsGm12874CtcfStdAln_2Reps	UWTFBS_GM12874_CTCF	CTCF	CTCF
wgEncodeUwTfbsGm12875CtcfStdAln_2Reps	UWTFBS_GM12875_CTCF	CTCF	CTCF
wgEncodeUwTfbsGm12878CtcfStdAln_2Reps	UWTFBS_GM12878_CTCF	CTCF	CTCF
wgEncodeUwTfbsHaspCtcfStdAln_1Reps	UWTFBS_HASP_CTCF	CTCF	CTCF
wgEncodeUwTfbsHbmecCtcfStdAln_2Reps	UWTFBS_HBMEC_CTCF	CTCF	CTCF
wgEncodeUwTfbsHcfaaCtcfStdAln_1Reps	UWTFBS_HCFAA_CTCF	CTCF	CTCF
wgEncodeUwTfbsHcpeCtcfStdAln_2Reps	UWTFBS_HCPE_CTCF	CTCF	CTCF
wgEncodeUwTfbsHeeCtcfStdAln_2Reps	UWTFBS_HEE_CTCF	CTCF	CTCF
wgEncodeUwTfbsHek293CtcfStdAln_2Reps	UWTFBS_HEK293_CTCF	CTCF	CTCF
wgEncodeUwTfbsHelas3CtcfStdAln_2Reps	UWTFBS_HELAS3_CTCF	CTCF	CTCF
wgEncodeUwTfbsHepg2CtcfStdAln_2Reps	UWTFBS_HEPG2_CTCF	CTCF	CTCF
wgEncodeUwTfbsHl60CtcfStdAln_1Reps	UWTFBS_HL60_CTCF	CTCF	CTCF
wgEncodeUwTfbsHmecCtcfStdAln_1Reps	UWTFBS_HMEC_CTCF	CTCF	CTCF
wgEncodeUwTfbsHmfCtcfStdAln_2Reps	UWTFBS_HMF_CTCF	CTCF	CTCF
wgEncodeUwTfbsHpafCtcfStdAln_2Reps	UWTFBS_HPAF_CTCF	CTCF	CTCF
wgEncodeUwTfbsHpfCtcfStdAln_2Reps	UWTFBS_HPF_CTCF	CTCF	CTCF
wgEncodeUwTfbsHreCtcfStdAln_2Reps	UWTFBS_HRE_CTCF	CTCF	CTCF
wgEncodeUwTfbsHrpeCtcfStdAln_1Reps	UWTFBS_HRPE_CTCF	CTCF	CTCF
wgEncodeUwTfbsHuvecCtcfStdAln_2Reps	UWTFBS_HUVEC_CTCF	CTCF	CTCF
wgEncodeUwTfbsK562CtcfStdAln_2Reps	UWTFBS_K562_CTCF	CTCF	CTCF
wgEncodeUwTfbsNhekCtcfStdAln_2Reps	UWTFBS_NHEK_CTCF	CTCF	CTCF
wgEncodeUwTfbsSaecCtcfStdAln_2Reps	UWTFBS_SAEC_CTCF	CTCF	CTCF
wgEncodeUwTfbsSknshraCtcfStdAln_2Reps	UWTFBS_SKNSHRA_CTCF	CTCF	CTCF
wgEncodeUwTfbsWerirb1CtcfStdAln_2Reps	UWTFBS_WERIRB1_CTCF	CTCF	CTCF
UchicagoTfbsK562EfosControlAln	UCHICAGOTFBS_K562_EFOS	EFOS	FOS
UchicagoTfbsK562Egata2ControlAln	UCHICAGOTFBS_K562_EGATA2	EGATA2	GATA2
UchicagoTfbsK562Ehdac8ControlAln	UCHICAGOTFBS_K562_EHDAC8	EHDAC8	HDAC8
UchicagoTfbsK562EjunbControlAln	UCHICAGOTFBS_K562_EJUNB	EJUNB	JUNB
UchicagoTfbsK562EjundControlAln	UCHICAGOTFBS_K562_EJUND	EJUND	JUND
UchicagoTfbsK562Enr4a1ControlAln	UCHICAGOTFBS_K562_ENR4A1	ENR4A1	NR4A1
