# Supplementary material for: Transcription Factor Binding Profiles Reveal Cyclic Expression of Human Protein-coding Genes and Non-coding RNAs
Source: PLoS Comput Biol. 2013 Jul 11;9(7):e1003132. doi: 10.1371/journal.pcbi.1003132 (PMC3708869; doi:10.1371/journal.pcbi.1003132)
Supplement: Table S3 — Gene Ontology analysis results of novel predicted cell cycle Refseq genes. (XLS) [file pcbi.1003132.s005.xls]

## Sheet: Sheet1
Category	Term	List Total	Count	Percentage (%)	Fold Enrichment	PValue	FDR
SP_PIR_KEYWORDS	nucleus	606	277	45.6343	1.92091	1.38e-33	1.94e-30
GOTERM_CC_FAT	GO:0005694~chromosome	402	69	11.3674	5.24961	6.74e-31	9.36e-28
SP_PIR_KEYWORDS	acetylation	606	205	33.7727	2.16218	1.03e-29	1.45e-26
GOTERM_BP_FAT	GO:0007049~cell cycle	452	92	15.1565	3.62209	3.22e-28	5.56e-25
GOTERM_CC_FAT	GO:0044427~chromosomal part	402	58	9.55519	5.35341	2.6e-26	3.6e-23
SP_PIR_KEYWORDS	phosphoprotein	606	377	62.1087	1.50427	3.15e-26	4.43e-23
GOTERM_BP_FAT	GO:0006259~DNA metabolic process	452	68	11.2026	4.23217	1.5e-24	2.59e-21
SP_PIR_KEYWORDS	cell cycle	606	63	10.3789	4.4565	1.31e-23	1.84e-20
GOTERM_BP_FAT	GO:0006281~DNA repair	452	50	8.23723	5.33259	1.54e-22	2.65e-19
GOTERM_BP_FAT	GO:0006974~response to DNA damage stimulus	452	57	9.39044	4.5117	6.26e-22	1.08e-18
GOTERM_BP_FAT	GO:0022402~cell cycle process	452	68	11.2026	3.68674	4.4e-21	7.6e-18
GOTERM_BP_FAT	GO:0022403~cell cycle phase	452	55	9.06096	4.41493	1.06e-20	1.83e-17
SP_PIR_KEYWORDS	DNA damage	606	41	6.75453	5.87303	5.91e-20	8.31e-17
GOTERM_BP_FAT	GO:0000279~M phase	452	45	7.41351	4.86789	1.17e-18	2.02e-15
SP_PIR_KEYWORDS	dna repair	606	38	6.2603	5.84515	1.91e-18	2.68e-15
SP_PIR_KEYWORDS	chromosomal protein	606	30	4.94234	7.47363	8.65e-18	1.22e-14
GOTERM_BP_FAT	GO:0033554~cellular response to stress	452	66	10.8731	3.28077	9.14e-18	1.58e-14
GOTERM_CC_FAT	GO:0043228~non-membrane-bounded organelle	402	158	26.0297	1.87283	1.06e-17	1.47e-14
GOTERM_CC_FAT	GO:0043232~intracellular non-membrane-bounded organelle	402	158	26.0297	1.87283	1.06e-17	1.47e-14
GOTERM_CC_FAT	GO:0000793~condensed chromosome	402	28	4.61285	7.577	7.72e-17	1.55e-13
GOTERM_BP_FAT	GO:0051276~chromosome organization	452	55	9.06096	3.48029	8.32e-16	1.34e-12
GOTERM_CC_FAT	GO:0005654~nucleoplasm	402	78	12.8501	2.6535	1.33e-15	1.85e-12
GOTERM_CC_FAT	GO:0000775~chromosome, centromeric region	402	24	3.95387	7.32721	4.5e-14	6.26e-11
GOTERM_CC_FAT	GO:0000785~chromatin	402	31	5.10708	5.31091	6e-14	8.32e-11
GOTERM_CC_FAT	GO:0005819~spindle	402	27	4.44811	6.18233	7.49e-14	1.04e-10
GOTERM_BP_FAT	GO:0000278~mitotic cell cycle	452	44	7.24876	3.74359	7.59e-14	1.31e-10
GOTERM_BP_FAT	GO:0007067~mitosis	452	31	5.10708	5.1403	1.47e-13	2.53e-10
GOTERM_BP_FAT	GO:0000280~nuclear division	452	31	5.10708	5.1403	1.47e-13	2.53e-10
KEGG_PATHWAY	hsa03030:DNA replication	183	15	2.47117	13.4255	1.66e-13	1.94e-10
GOTERM_BP_FAT	GO:0000087~M phase of mitotic cell cycle	452	31	5.10708	5.06634	2.2e-13	3.8e-10
GOTERM_CC_FAT	GO:0031981~nuclear lumen	402	102	16.804	2.07073	2.9e-13	4.02e-10
GOTERM_BP_FAT	GO:0048285~organelle fission	452	31	5.10708	4.82343	8.61e-13	1.49e-09
SP_PIR_KEYWORDS	mitosis	606	27	4.44811	5.62561	9.26e-13	1.3e-09
GOTERM_CC_FAT	GO:0070013~intracellular organelle lumen	402	117	19.2751	1.89794	1.07e-12	1.49e-09
GOTERM_BP_FAT	GO:0006260~DNA replication	452	28	4.61285	5.04818	4.33e-12	7.47e-09
GOTERM_CC_FAT	GO:0031974~membrane-enclosed lumen	402	119	19.6046	1.84372	4.7e-12	6.52e-09
GOTERM_CC_FAT	GO:0043233~organelle lumen	402	117	19.2751	1.85374	5.4e-12	7.5e-09
GOTERM_BP_FAT	GO:0051301~cell division	452	34	5.60132	4.06511	8.29e-12	1.43e-08
SP_PIR_KEYWORDS	cell division	606	31	5.10708	4.25445	3.02e-11	4.25e-08
GOTERM_BP_FAT	GO:0006310~DNA recombination	452	21	3.45964	6.36071	4.03e-11	6.95e-08
GOTERM_BP_FAT	GO:0006323~DNA packaging	452	20	3.29489	6.58458	6.75e-11	1.17e-07
GOTERM_CC_FAT	GO:0000228~nuclear chromosome	402	25	4.11862	5.04522	7.94e-11	1.1e-07
GOTERM_BP_FAT	GO:0006334~nucleosome assembly	452	16	2.63591	8.26066	2.47e-10	4.26e-07
GOTERM_BP_FAT	GO:0031497~chromatin assembly	452	16	2.63591	8.07709	3.55e-10	6.14e-07
SP_PIR_KEYWORDS	dna replication	606	17	2.80066	7.21529	6.23e-10	8.76e-07
GOTERM_BP_FAT	GO:0065004~protein-DNA complex assembly	452	16	2.63591	7.73338	7.14e-10	1.23e-06
SP_PIR_KEYWORDS	centromere	606	12	1.97694	11.9578	8.22e-10	1.16e-06
GOTERM_BP_FAT	GO:0006333~chromatin assembly or disassembly	452	20	3.29489	5.75109	8.58e-10	1.48e-06
GOTERM_CC_FAT	GO:0032993~protein-DNA complex	402	16	2.63591	7.18896	2.4e-09	3.34e-06
GOTERM_BP_FAT	GO:0034728~nucleosome organization	452	16	2.63591	7.12684	2.58e-09	4.45e-06
GOTERM_BP_FAT	GO:0007051~spindle organization	452	12	1.97694	10.9041	2.65e-09	4.58e-06
GOTERM_CC_FAT	GO:0044454~nuclear chromosome part	402	20	3.29489	5.41214	2.69e-09	3.73e-06
GOTERM_CC_FAT	GO:0000779~condensed chromosome, centromeric region	402	14	2.30643	8.13142	6.1e-09	8.46e-06
INTERPRO	IPR009072:Histone-fold	532	12	1.97694	10.0336	8.47e-09	1.33e-05
GOTERM_CC_FAT	GO:0015630~microtubule cytoskeleton	402	45	7.41351	2.58218	9.72e-09	1.35e-05
GOTERM_BP_FAT	GO:0006325~chromatin organization	452	36	5.93081	2.86949	3.03e-08	5.24e-05
GOTERM_BP_FAT	GO:0006261~DNA-dependent DNA replication	452	13	2.14168	7.57227	5.91e-08	0.000102
INTERPRO	IPR007125:Histone core	532	10	1.64745	11.1484	8.08e-08	0.000127
SP_PIR_KEYWORDS	methylation	606	28	4.61285	3.30792	8.75e-08	0.000123
GOTERM_BP_FAT	GO:0006302~double-strand break repair	452	14	2.30643	6.62574	9e-08	0.000155
UP_SEQ_FEATURE	mutagenesis site	606	120	19.7694	1.60309	1.05e-07	0.000177
GOTERM_MF_FAT	GO:0003677~DNA binding	435	120	19.7694	1.56834	1.31e-07	0.000194
KEGG_PATHWAY	hsa04110:Cell cycle	183	18	2.9654	4.6585	1.37e-07	0.000159
GOTERM_CC_FAT	GO:0000786~nucleosome	402	12	1.97694	7.93781	1.42e-07	0.000197
GOTERM_BP_FAT	GO:0000375~RNA splicing, via transesterification reactions	452	22	3.62438	3.84438	2.03e-07	0.000351
GOTERM_BP_FAT	GO:0000398~nuclear mRNA splicing, via spliceosome	452	22	3.62438	3.84438	2.03e-07	0.000351
GOTERM_BP_FAT	GO:0000377~RNA splicing, via transesterification reactions with bulged adenosine as nucleophile	452	22	3.62438	3.84438	2.03e-07	0.000351
GOTERM_CC_FAT	GO:0005635~nuclear envelope	402	24	3.95387	3.46377	3.5e-07	0.000485
GOTERM_BP_FAT	GO:0034622~cellular macromolecular complex assembly	452	30	4.94234	2.87555	5.18e-07	0.000894
GOTERM_BP_FAT	GO:0000226~microtubule cytoskeleton organization	452	19	3.13015	4.15019	5.31e-07	0.000916
SP_PIR_KEYWORDS	repressor	606	37	6.09555	2.52383	5.76e-07	0.00081
SP_PIR_KEYWORDS	nucleosome core	606	10	1.64745	9.16766	5.81e-07	0.000817
GOTERM_BP_FAT	GO:0051321~meiotic cell cycle	452	15	2.47117	5.24234	6.34e-07	0.00109362
INTERPRO	IPR012677:Nucleotide-binding, alpha-beta plait	532	24	3.95387	3.36455	6.41e-07	0.00100307
GOTERM_BP_FAT	GO:0007017~microtubule-based process	452	25	4.11862	3.19056	8.79e-07	0.00151639
GOTERM_BP_FAT	GO:0008380~RNA splicing	452	29	4.77759	2.86429	9.07e-07	0.00156613
UP_SEQ_FEATURE	short sequence motif:Nuclear localization signal	606	32	5.27183	2.6954	9.54e-07	0.00160271
GOTERM_BP_FAT	GO:0007059~chromosome segregation	452	13	2.14168	5.90637	1.18e-06	0.00203761
GOTERM_CC_FAT	GO:0005815~microtubule organizing center	402	25	4.11862	3.13335	1.22e-06	0.00168974
GOTERM_CC_FAT	GO:0030529~ribonucleoprotein complex	402	41	6.75453	2.26531	1.63e-06	0.00226669
SP_PIR_KEYWORDS	dna recombination	606	10	1.64745	8.18541	1.75e-06	0.00245516
GOTERM_BP_FAT	GO:0034621~cellular macromolecular complex subunit organization	452	31	5.10708	2.62769	2.2e-06	0.00379658
SP_PIR_KEYWORDS	Fanconi anemia	606	7	1.15321	14.5849	2.55e-06	0.00359035
SP_PIR_KEYWORDS	kinetochore	606	11	1.81219	6.8138	2.74e-06	0.00384983
GOTERM_CC_FAT	GO:0030530~heterogeneous nuclear ribonucleoprotein complex	402	8	1.31796	11.2063	2.9e-06	0.00402731
GOTERM_BP_FAT	GO:0006397~mRNA processing	452	30	4.94234	2.60116	4.04e-06	0.00696861
GOTERM_BP_FAT	GO:0016071~mRNA metabolic process	452	33	5.43657	2.45788	4.08e-06	0.00704727
GOTERM_CC_FAT	GO:0000776~kinetochore	402	12	1.97694	5.83186	4.2e-06	0.00583123
SP_PIR_KEYWORDS	mrna splicing	606	23	3.78913	3.11917	4.23e-06	0.00594664
GOTERM_BP_FAT	GO:0006297~nucleotide-excision repair, DNA gap filling	452	7	1.15321	13.2515	5.12e-06	0.00884068
SMART	SM00360:RRM	294	22	3.62438	3.13878	5.38e-06	0.00668176
GOTERM_BP_FAT	GO:0010564~regulation of cell cycle process	452	16	2.63591	4.13033	5.74e-06	0.00990107
SP_PIR_KEYWORDS	cytoplasm	606	162	26.6886	1.37719	6.5e-06	0.00913285
