# Supplementary material for: Transcription Factor Binding Profiles Reveal Cyclic Expression of Human Protein-coding Genes and Non-coding RNAs
Source: PLoS Comput Biol. 2013 Jul 11;9(7):e1003132. doi: 10.1371/journal.pcbi.1003132 (PMC3708869; doi:10.1371/journal.pcbi.1003132)
Supplement: Table S5 — Gene Ontology analysis results of GENCODE annotated protein-coding genes that are predicated to be cell cycle regulated. (XLS) [file pcbi.1003132.s007.xls]

## Sheet: Sheet1
Category	Term	List Total	Count	Percentage (%)	Fold Enrichment	P-Value	FDR
SP_PIR_KEYWORDS	cell cycle	999	138	13.7725	5.76375	6.28e-67	9.02e-64
GOTERM_BP_FAT	GO:0007049~cell cycle	767	182	18.1637	4.13664	3.07e-66	5.45e-63
GOTERM_CC_FAT	GO:0005694~chromosome	662	131	13.0739	5.49863	3.02e-62	4.29e-59
SP_PIR_KEYWORDS	phosphoprotein	999	628	62.6747	1.66483	4.46e-61	6.4e-58
GOTERM_BP_FAT	GO:0022403~cell cycle phase	767	128	12.7745	5.45316	2.47e-60	4.38e-57
SP_PIR_KEYWORDS	nucleus	999	449	44.8104	2.01848	4.12e-60	5.91e-57
GOTERM_BP_FAT	GO:0000279~M phase	767	114	11.3772	6.11149	2.39e-59	4.23e-56
GOTERM_CC_FAT	GO:0044427~chromosomal part	662	115	11.477	5.75243	1.52e-56	2.16e-53
GOTERM_BP_FAT	GO:0022402~cell cycle process	767	142	14.1717	4.4328	1.05e-54	1.86e-51
GOTERM_BP_FAT	GO:0007067~mitosis	767	88	8.78244	7.05502	1.9e-51	3.36e-48
GOTERM_BP_FAT	GO:0000280~nuclear division	767	88	8.78244	7.05502	1.9e-51	3.36e-48
GOTERM_BP_FAT	GO:0000087~M phase of mitotic cell cycle	767	88	8.78244	6.92904	1.12e-50	1.98e-47
GOTERM_BP_FAT	GO:0006259~DNA metabolic process	767	129	12.8743	4.49653	3.37e-50	5.97e-47
GOTERM_BP_FAT	GO:0048285~organelle fission	767	88	8.78244	6.77775	9.65e-50	1.71e-46
SP_PIR_KEYWORDS	cell division	999	91	9.08184	6.63688	1.73e-49	2.48e-46
SP_PIR_KEYWORDS	mitosis	999	76	7.58483	7.9963	4.96e-48	7.13e-45
GOTERM_BP_FAT	GO:0000278~mitotic cell cycle	767	106	10.5788	5.05292	4.31e-46	7.64e-43
SP_PIR_KEYWORDS	acetylation	999	301	30.0399	2.19944	1.14e-43	1.64e-40
GOTERM_BP_FAT	GO:0051301~cell division	767	92	9.18164	5.50052	3.12e-43	5.54e-40
GOTERM_CC_FAT	GO:0043232~intracellular non-membrane-bounded organelle	662	272	27.1457	2.02304	4.57e-36	6.49e-33
GOTERM_CC_FAT	GO:0043228~non-membrane-bounded organelle	662	272	27.1457	2.02304	4.57e-36	6.49e-33
GOTERM_CC_FAT	GO:0000793~condensed chromosome	662	53	5.28942	7.93281	1.74e-33	2.48e-30
GOTERM_BP_FAT	GO:0006281~DNA repair	767	79	7.88423	4.90622	3.62e-33	6.42e-30
GOTERM_BP_FAT	GO:0006260~DNA replication	767	65	6.48703	6.0339	4.4e-33	7.8e-30
GOTERM_BP_FAT	GO:0006974~response to DNA damage stimulus	767	90	8.98204	4.25571	1.2e-32	2.13e-29
GOTERM_CC_FAT	GO:0000775~chromosome, centromeric region	662	50	4.99002	7.78555	4.02e-31	5.72e-28
GOTERM_CC_FAT	GO:0031981~nuclear lumen	662	179	17.8643	2.38356	2.29e-30	3.26e-27
GOTERM_BP_FAT	GO:0051276~chromosome organization	767	100	9.98004	3.63661	2.54e-30	4.5e-27
GOTERM_CC_FAT	GO:0005654~nucleoplasm	662	132	13.1737	2.88966	7.61e-30	1.08e-26
KEGG_PATHWAY	hsa04110:Cell cycle	297	48	4.79042	6.57455	2.81e-27	3.36e-24
GOTERM_CC_FAT	GO:0070013~intracellular organelle lumen	662	195	19.4611	2.11641	1.51e-26	2.15e-23
GOTERM_BP_FAT	GO:0033554~cellular response to stress	767	102	10.1796	3.1785	5.09e-26	9.02e-23
GOTERM_CC_FAT	GO:0043233~organelle lumen	662	195	19.4611	2.06873	2.73e-25	3.88e-22
SP_PIR_KEYWORDS	chromosomal protein	999	48	4.79042	6.37382	3.18e-25	4.57e-22
GOTERM_CC_FAT	GO:0031974~membrane-enclosed lumen	662	197	19.6607	2.04941	4.52e-25	6.43e-22
SP_PIR_KEYWORDS	dna replication	999	38	3.79242	8.31434	9.51e-25	1.37e-21
SP_PIR_KEYWORDS	DNA damage	999	55	5.48902	5.16578	6.64e-24	9.54e-21
GOTERM_CC_FAT	GO:0000785~chromatin	662	52	5.18962	5.02012	3.21e-22	4.56e-19
GOTERM_CC_FAT	GO:0005819~spindle	662	44	4.39122	5.77931	1.98e-21	2.82e-18
GOTERM_BP_FAT	GO:0007059~chromosome segregation	767	34	3.39321	7.40342	1.34e-20	2.37e-17
SP_PIR_KEYWORDS	dna repair	999	49	4.89022	4.93957	1.86e-20	2.67e-17
GOTERM_BP_FAT	GO:0006323~DNA packaging	767	40	3.99202	6.02993	2.07e-20	3.67e-17
SP_PIR_KEYWORDS	kinetochore	999	29	2.89421	8.86307	7.48e-20	1.07e-16
GOTERM_CC_FAT	GO:0015630~microtubule cytoskeleton	662	83	8.28343	2.91908	8.03e-19	1.14e-15
GOTERM_BP_FAT	GO:0007051~spindle organization	767	25	2.49501	9.79864	9.63e-19	1.71e-15
GOTERM_CC_FAT	GO:0000779~condensed chromosome, centromeric region	662	28	2.79441	8.19134	3.71e-18	5.28e-15
GOTERM_CC_FAT	GO:0000228~nuclear chromosome	662	42	4.19162	5.00582	5.73e-18	8.15e-15
GOTERM_BP_FAT	GO:0051726~regulation of cell cycle	767	64	6.38723	3.41028	5.86e-18	1.04e-14
GOTERM_CC_FAT	GO:0000776~kinetochore	662	29	2.89421	7.2719	3.55e-17	5.05e-14
SP_PIR_KEYWORDS	centromere	999	21	2.09581	10.6405	2.18e-16	3.22e-13
UP_SEQ_FEATURE	mutagenesis site	998	192	19.1617	1.79807	2.48e-16	3.89e-13
GOTERM_BP_FAT	GO:0065004~protein-DNA complex assembly	767	31	3.09381	6.0084	8.47e-16	1.58e-12
GOTERM_BP_FAT	GO:0031497~chromatin assembly	767	30	2.99401	6.08191	1.83e-15	3.15e-12
SP_PIR_KEYWORDS	ubl conjugation	999	81	8.08383	2.65237	2e-15	2.86e-12
GOTERM_BP_FAT	GO:0000226~microtubule cytoskeleton organization	767	38	3.79242	4.55937	6.5e-15	1.16e-11
GOTERM_CC_FAT	GO:0032993~protein-DNA complex	662	28	2.79441	6.28638	9.85e-15	1.4e-11
GOTERM_BP_FAT	GO:0034728~nucleosome organization	767	30	2.99401	5.68953	1.33e-14	2.36e-11
GOTERM_BP_FAT	GO:0006325~chromatin organization	767	63	6.28743	2.93959	2.14e-14	3.8e-11
GOTERM_CC_FAT	GO:0000777~condensed chromosome kinetochore	662	23	2.29541	7.65668	3.43e-14	4.88e-11
GOTERM_BP_FAT	GO:0006334~nucleosome assembly	767	28	2.79441	5.87918	4.72e-14	8.36e-11
GOTERM_CC_FAT	GO:0044454~nuclear chromosome part	662	32	3.19361	5.06443	6.84e-14	9.72e-11
GOTERM_BP_FAT	GO:0006333~chromatin assembly or disassembly	767	34	3.39321	4.72186	7.13e-14	1.26e-10
GOTERM_BP_FAT	GO:0051321~meiotic cell cycle	767	30	2.99401	5.29126	1.09e-13	1.94e-10
KEGG_PATHWAY	hsa03030:DNA replication	297	19	1.89621	9.0362	1.24e-13	1.49e-10
GOTERM_BP_FAT	GO:0051327~M phase of meiotic cell cycle	767	29	2.89421	5.21927	4.39e-13	7.78e-10
GOTERM_BP_FAT	GO:0007126~meiosis	767	29	2.89421	5.21927	4.39e-13	7.78e-10
GOTERM_MF_FAT	GO:0003677~DNA binding	698	201	20.0599	1.60389	5.47e-13	8.43e-10
UP_SEQ_FEATURE	cross-link:Glycyl lysine isopeptide (Lys-Gly) (interchain with G-Cter in ubiquitin)	998	40	3.99202	3.84951	6.12e-13	1.08e-09
GOTERM_BP_FAT	GO:0007017~microtubule-based process	767	47	4.69062	3.27654	1.35e-12	2.39e-09
GOTERM_BP_FAT	GO:0000070~mitotic sister chromatid segregation	767	18	1.79641	8.81877	1.65e-12	2.93e-09
SP_PIR_KEYWORDS	cytoplasm	999	259	25.8483	1.49665	2.34e-12	3.35e-09
GOTERM_BP_FAT	GO:0000819~sister chromatid segregation	767	18	1.79641	8.58043	2.9e-12	5.14e-09
GOTERM_BP_FAT	GO:0034621~cellular macromolecular complex subunit organization	767	56	5.58882	2.76667	8.85e-12	1.57e-08
GOTERM_BP_FAT	GO:0034622~cellular macromolecular complex assembly	767	52	5.18962	2.88413	1.14e-11	2.02e-08
GOTERM_BP_FAT	GO:0006261~DNA-dependent DNA replication	767	21	2.09581	6.38601	2.15e-11	3.82e-08
GOTERM_BP_FAT	GO:0010564~regulation of cell cycle process	767	29	2.89421	4.48674	2.46e-11	4.36e-08
INTERPRO	IPR007125:Histone core	864	18	1.79641	7.7125	3.34e-11	5.43e-08
GOTERM_MF_FAT	GO:0000166~nucleotide binding	698	189	18.8623	1.5659	3.47e-11	5.34e-08
GOTERM_BP_FAT	GO:0006310~DNA recombination	767	27	2.69461	4.53537	1.05e-10	1.85e-07
SP_PIR_KEYWORDS	nucleosome core	999	18	1.79641	7.22035	1.16e-10	1.66e-07
GOTERM_CC_FAT	GO:0000786~nucleosome	662	20	1.99601	6.12957	2.01e-10	2.86e-07
GOTERM_CC_FAT	GO:0044430~cytoskeletal part	662	96	9.58084	1.94704	2.31e-10	3.28e-07
SP_PIR_KEYWORDS	atp-binding	999	122	12.1756	1.77151	5.54e-10	7.95e-07
GOTERM_BP_FAT	GO:0006302~double-strand break repair	767	20	1.99601	5.68953	6.92e-10	1.23e-06
INTERPRO	IPR009072:Histone-fold	864	18	1.79641	6.42708	9.19e-10	1.49e-06
SP_PIR_KEYWORDS	isopeptide bond	999	46	4.59082	2.77648	9.89e-10	1.42e-06
SP_PIR_KEYWORDS	Chromosome partition	999	14	1.39721	8.69547	1.57e-09	2.26e-06
UP_SEQ_FEATURE	nucleotide phosphate-binding region:ATP	998	95	9.48104	1.89124	2.55e-09	4.49e-06
GOTERM_CC_FAT	GO:0005815~microtubule organizing center	662	39	3.89222	2.97636	2.65e-09	3.77e-06
GOTERM_MF_FAT	GO:0043566~structure-specific DNA binding	698	29	2.89421	3.72006	2.71e-09	4.18e-06
SP_PIR_KEYWORDS	methylation	999	38	3.79242	3.0234	3.37e-09	4.84e-06
SP_PIR_KEYWORDS	nucleotide-binding	999	143	14.2715	1.63307	3.59e-09	5.16e-06
GOTERM_CC_FAT	GO:0005813~centrosome	662	36	3.59281	3.1031	3.96e-09	5.63e-06
GOTERM_BP_FAT	GO:0000075~cell cycle checkpoint	767	23	2.29541	4.45784	4.66e-09	8.26e-06
GOTERM_CC_FAT	GO:0005635~nuclear envelope	662	34	3.39321	3.20233	5.17e-09	7.35e-06
SP_PIR_KEYWORDS	dna-binding	999	154	15.3693	1.58734	5.41e-09	7.77e-06
GOTERM_MF_FAT	GO:0005524~ATP binding	698	130	12.9741	1.63713	8.62e-09	1.33e-05
GOTERM_MF_FAT	GO:0032559~adenyl ribonucleotide binding	698	131	13.0739	1.62768	1.05e-08	1.61e-05
GOTERM_CC_FAT	GO:0000794~condensed nuclear chromosome	662	16	1.59681	6.3047	1.32e-08	1.87e-05
BBID	1.RBphosphoE2F	26	10	0.998004	9.83516	1.38e-08	1.1e-05
KEGG_PATHWAY	hsa03430:Mismatch repair	297	12	1.1976	8.93281	1.56e-08	1.87e-05
KEGG_PATHWAY	hsa03440:Homologous recombination	297	13	1.29741	7.94913	1.59e-08	1.91e-05
GOTERM_MF_FAT	GO:0003697~single-stranded DNA binding	698	17	1.69661	5.74918	1.67e-08	2.58e-05
GOTERM_MF_FAT	GO:0030554~adenyl nucleotide binding	698	135	13.4731	1.59229	2.27e-08	3.49e-05
GOTERM_CC_FAT	GO:0005829~cytosol	662	115	11.477	1.6695	2.59e-08	3.68e-05
GOTERM_BP_FAT	GO:0007346~regulation of mitotic cell cycle	767	29	2.89421	3.36506	2.61e-08	4.62e-05
GOTERM_CC_FAT	GO:0005657~replication fork	662	13	1.29741	7.84394	2.88e-08	4.09e-05
GOTERM_MF_FAT	GO:0001882~nucleoside binding	698	136	13.5729	1.56925	4.88e-08	7.52e-05
GOTERM_MF_FAT	GO:0001883~purine nucleoside binding	698	135	13.4731	1.56842	5.74e-08	8.84e-05
GOTERM_CC_FAT	GO:0000922~spindle pole	662	13	1.29741	7.38253	6.35e-08	9.03e-05
SP_PIR_KEYWORDS	alternative splicing	999	470	46.9062	1.20853	6.45e-08	9.26e-05
GOTERM_BP_FAT	GO:0051052~regulation of DNA metabolic process	767	24	2.39521	3.71317	8.08e-08	0.000143
GOTERM_BP_FAT	GO:0051325~interphase	767	23	2.29541	3.82702	9.09e-08	0.000161
GOTERM_BP_FAT	GO:0006297~nucleotide-excision repair, DNA gap filling	767	10	0.998004	10.375	9.21e-08	0.000163
UP_SEQ_FEATURE	splice variant	998	469	46.8064	1.20434	1.04e-07	0.000184
UP_SEQ_FEATURE	short sequence motif:Nuclear localization signal	998	42	4.19162	2.47494	1.54e-07	0.000272
SP_PIR_KEYWORDS	cell cycle control	999	12	1.1976	7.45326	2.25e-07	0.000324
SP_PIR_KEYWORDS	mrna processing	999	36	3.59281	2.66597	2.3e-07	0.00033
GOTERM_BP_FAT	GO:0051329~interphase of mitotic cell cycle	767	22	2.19561	3.76724	2.45e-07	0.000434
GOTERM_MF_FAT	GO:0032553~ribonucleotide binding	698	147	14.6707	1.48924	3.16e-07	0.000487
GOTERM_MF_FAT	GO:0032555~purine ribonucleotide binding	698	147	14.6707	1.48924	3.16e-07	0.000487
GOTERM_MF_FAT	GO:0003682~chromatin binding	698	26	2.59481	3.22405	3.85e-07	0.000593
GOTERM_BP_FAT	GO:0007052~mitotic spindle organization	767	9	0.898204	10.5825	4.6e-07	0.000815
GOTERM_MF_FAT	GO:0017076~purine nucleotide binding	698	151	15.0699	1.46436	5.66e-07	0.000871
GOTERM_BP_FAT	GO:0033043~regulation of organelle organization	767	33	3.29341	2.68221	5.92e-07	0.00104985
GOTERM_CC_FAT	GO:0005856~cytoskeleton	662	113	11.2774	1.57989	6.38e-07	0.000907
GOTERM_BP_FAT	GO:0008380~RNA splicing	767	39	3.89222	2.42206	6.61e-07	0.00117128
SP_PIR_KEYWORDS	DNA binding	999	41	4.09182	2.32184	1.17e-06	0.00168414
GOTERM_BP_FAT	GO:0000079~regulation of cyclin-dependent protein kinase activity	767	15	1.49701	4.89932	1.21e-06	0.00213782
SP_PIR_KEYWORDS	Fanconi anemia	999	8	0.798403	11.8488	1.29e-06	0.00185444
GOTERM_BP_FAT	GO:0007010~cytoskeleton organization	767	51	5.08982	2.06311	1.42e-06	0.00252167
GOTERM_BP_FAT	GO:0006289~nucleotide-excision repair	767	15	1.49701	4.81024	1.53e-06	0.00272011
SP_PIR_KEYWORDS	repressor	999	48	4.79042	2.12461	1.63e-06	0.00234617
SP_PIR_KEYWORDS	chromatin regulator	999	30	2.99401	2.71187	1.94e-06	0.00278894
SP_PIR_KEYWORDS	coiled coil	999	152	15.1697	1.44955	1.99e-06	0.00285903
GOTERM_BP_FAT	GO:0007127~meiosis I	767	13	1.29741	5.45924	2.28e-06	0.00404362
GOTERM_BP_FAT	GO:0007076~mitotic chromosome condensation	767	8	0.798403	10.8539	2.31e-06	0.00409104
KEGG_PATHWAY	hsa03040:Spliceosome	297	23	2.29541	3.1253	2.54e-06	0.00303648
KEGG_PATHWAY	hsa03410:Base excision repair	297	12	1.1976	5.87013	2.56e-06	0.00306506
GOTERM_BP_FAT	GO:0043933~macromolecular complex subunit organization	767	71	7.08583	1.76375	3.36e-06	0.00595717
SP_PIR_KEYWORDS	microtubule	999	31	3.09381	2.5839	3.48e-06	0.00500206
KEGG_PATHWAY	hsa04114:Oocyte meiosis	297	21	2.09581	3.2686	3.86e-06	0.00461974
SP_PIR_KEYWORDS	mrna splicing	999	29	2.89421	2.67164	3.99e-06	0.00573186
INTERPRO	IPR000504:RNA recognition motif, RNP-1	864	29	2.89421	2.65003	4.56e-06	0.00740203
GOTERM_BP_FAT	GO:0000375~RNA splicing, via transesterification reactions	767	25	2.49501	2.88195	5.1e-06	0.00903104
GOTERM_BP_FAT	GO:0000377~RNA splicing, via transesterification reactions with bulged adenosine as nucleophile	767	25	2.49501	2.88195	5.1e-06	0.00903104
GOTERM_BP_FAT	GO:0000398~nuclear mRNA splicing, via spliceosome	767	25	2.49501	2.88195	5.1e-06	0.00903104
GOTERM_CC_FAT	GO:0005874~microtubule	662	34	3.39321	2.3959	5.12e-06	0.00727553
GOTERM_BP_FAT	GO:0030261~chromosome condensation	767	10	0.998004	7.05502	5.13e-06	0.00908901
GOTERM_BP_FAT	GO:0065003~macromolecular complex assembly	767	67	6.68663	1.77702	5.28e-06	0.00935438
GOTERM_BP_FAT	GO:0006397~mRNA processing	767	40	3.99202	2.19783	5.3e-06	0.0093908
INTERPRO	IPR003959:ATPase, AAA-type, core	864	13	1.29741	5.11543	5.4e-06	0.00877527
INTERPRO	IPR012677:Nucleotide-binding, alpha-beta plait	864	29	2.89421	2.62515	5.48e-06	0.008895
GOTERM_BP_FAT	GO:0016071~mRNA metabolic process	767	44	4.39122	2.09744	5.55e-06	0.00984411
SMART	SM00360:RRM	483	29	2.89421	2.58349	6.26e-06	0.0080315
BIOCARTA	h_cellcyclePathway:Cyclins and Cell Cycle Regulation	115	11	1.0978	5.49809	7.93e-06	0.00961971
